# Supplementary material for: Exploring precipitation pattern scaling methodologies and robustness among CMIP5 models
Source: Copernicus journal article supplement (doi:10.5194/gmd-2016-258), 2016-11-23
Supplement: Supplementary file [file gmd-2016-258-RC1-supplement.pdf]

Review comments on the manuscript

## **Exploring precipitation pattern scaling methodologies and robustness among CMIP5 models**

by B. Kravitz, C. Lynch, C. Hartin and B. Bond-Lamberty

submitted to Geoscientific Model Development.

Recommendation: Accept with substantial revisions.

In my opinion, the paper constitutes an interesting contribution that should be published in Geoscientific Model Development after adequate revisions. An evaluation of the performance of different pattern scaling methods for climate variables other than temperature (here: precipitation) is of significant practical importance. The evident main conclusion of the work is that two of the methods work reasonably but the third one does not. This should be clarified in the text.

### **1 General comments**

1. Regarding the two traditionally-used methods, here termed the regression and epoch methods, I mainly agree with the conclusions presented by the authors. These methods appear to be fit for scaling precipitation. However, the verbal assessments given for the “physically-based” method in the manuscript do not seem to be supported by the quantitative results presented in the figures and Table 3. Examples of statements that I find unjustified: “the physically-based method shows a greater degree of robustness (less relative root-mean-square variation than the other two methods) and could be a particularly advantageous method if outstanding biases could be reduced” (abstract, l. 7–9); “This indicates the potential for robustness of the physically-based method” (p. 5, l. 2); “The overall performance of the physically-based method is still worse in all cases, but these results suggest that if the overall bias in the physically-based method could be reduced or corrected, it holds great promise in being a useful pattern scaling method...” (p. 8, l. 26–28); “The physically-based method has substantially worse performance than the other two methods but shows some features of robustness that could be advantageous if overall biases in the method could be reduced” (p. 12, l. 16–18).

In all the examples studied, the performance of the “physically-based” method appears to be inferior to the other two methods (Table 3). In some cases (e.g., that depicted in Fig. 6), the gap between the performances is apparently somewhat smaller. Note, however, that in these experiments the magnitude of the projected change  $B$  is small, which makes the scaling error  $\hat{B} - B$  small as well. Accordingly, in these cases the small RMS error produced by the “physically-based” method is likely to be a trivial consequence of the smallness of  $B$ . (See further discussion in “specific comments”.)

Furthermore, on l. 10–11 of p. 3 it is stated that “There are many possibilities for physically-based approaches”. Therefore, I suggest that the authors should use some other, more specified name for the version of the method examined in this paper. Note also that ‘physically-based’ inherently sounds very positive and thus a more neutral term should be preferred; particularly, taking into account the low performance of that method.

2. The number of figures in the paper, 19, is excessive. In particular, there are plenty of figures (14) that visually very similar, consisting of a set of six global map panels. A high level of concentration is required for a reader in order to study this large manifold of illustrations. I find that it is mainly Figs. 4, 9, 10, 12, 14 and 16 that include key information. Conversely, Figs. 5–7, 11, 15 and 17–19 are not that essential and mainly relevant for readers of special interest. For the majority of readers, it would facilitate reading the article if these figures (or a significant portion of them) would be shifted into an electronic supplemental file that is available in conjunction with the article.
3. Is the precipitation variable discussed in the paper an annual mean? That should be specified in the abstract, introduction, conclusions and, perhaps, in some of the figure captions as well.
4. Compared to the other two methods, the performance of the “physically-based” method is very poor. The poorness is so striking that I recommend that the authors should check the correctness of their algorithms once again.

## 2 Specific comments

1. Interpolation, extrapolation. For readers less familiar with the idea, please specify that you are dealing with interpolation (extrapolation) **in time** (p. 1, 3, 7, 8 and 12).
2. Earth System Models (ESMs) vs. Atmosphere-Ocean General Circulation Models (AOGCMs). According to the definition applied in Chapter 9 of IPCC (2013), ESMs are those climate models that include an interactive carbon cycle. All models listed in Table 1 of your paper do not fulfil this criterion but belong to the category of AOGCMs. I recommend that you would use the same terminology as IPCC (2013). — This does not have any impact on the quantitative findings as you have used concentration-driven model runs alone (p. 5, l. 7).
3. P. 4, l. 8–17: The idea of the “physically-based” method should be explained in more detail. The present formulation is not adequate to make the idea understandable without consulting the reference.
4. There is an error in Eq. (5): in the denominator, replace  $s_1^2$  by  $s_1^4$  and  $s_2^2$  by  $s_2^4$ . Check whether this is an typing error only or whether you have used the wrong  $df$  in the calculations.
5. P. 7, l. 18: the poorer performance of these two methods may be due to the large contribution of noise in the pattern of  $P$  that is determined from the early years of the simulation when the true climate change signal is weak.
6. P. 7, l. 20–23: The error for the “physically-based” method is not similar but nearly double that produced by the other methods (Table 3). More importantly: the smallness of the error for the “physically-based” method may have been caused by the fact that  $P = 0$  over the majority of the domain. Then, in these areas  $\hat{B} = 0$  as well and, since  $B$  is small, the difference  $B - \hat{B} = 0$  is likewise small. Thus, the smallness of the RMS error is not any indication of the good performance of the “physically-based” method. See also general comment 1 and the text that you have written on p. 8, l. 19–21 and p. 11, l. 12.

7. P. 7, l. 27–28: “error is reduced by a factor of two for the physically-based method”: is this a trivial consequence of the smallness of  $B$ ? “and increases by a factor of two for the regression and epoch difference methods”: this may be an indication of true non-linearity. Also, p. 8, l. 22–26 need revision.
8. Section 3.3 and Fig. 8: When you present the results for a certain number of models, have you used in each experiment **the same** sub-ensemble models in calculating  $P$  and  $B$ ? Or are the models chosen randomly for that comparison? Please clarify.
9. P. 9, l. 17–19: I did not understand the idea. How the dominance of the  $\text{CO}_2$  response helps to apply the non- $\text{CO}_2$  pattern for the other scenarios? Please clarify. Note also that the non- $\text{CO}_2$  response includes both a warming (other GHGs) and cooling component (aerosol forcing) that may have different ratios in the various RCP forcing scenarios.
10. P. 10, l. 28–32: Note that warming does not follow radiative forcing immediately but, due to the thermal inertia of oceans etc., with a lag. Has this been taken into account? If not, a caveat should be included in the text.
11. P. 34, l. 9–11: In my opinion, there is a contradiction between the text and the Figure captions 18–19. In the captions, it is stated that  $P$  is extracted from one group of models and  $\Delta T$  and  $B$  from the another group. Thus, the experiments would be “antisymmetric” and accordingly, one would expect that the errors would be of a similar order of magnitude. Differences in  $P$  between the groups 1 and 2 should affect Figs. 18 and 19 by about a similar magnitude. According to the text, figures and Table 3, however, this is not so. Please check and clarify.
12. The discussion presented in the Appendix might be transferred into electronic supplementary material.

### 3 Minor comments

1. P. 1, l. 12–13: for other models -> to be utilized in other models ?
2. P. 2, l. 19: a long history of research -> a fairly long history of research (the method has been used for a few decades, not millenia).
3. P. 2, l. 26–27: “no single fit (e.g., regression coefficients) will be applicable to all grid points” (and a similar statement on p. 3, l. 27–28). This is a trivial consequence of the fact that the modelled precipitation change is not geographically uniform. If you want to say something more, please clarify.
4. P. 3, l. 6–7: “If the climate response is perfectly linear, then any pattern scaling method will work equally well and will be highly accurate.” I would prefer a more conditional formulation, e.g.: “If the climate response were perfectly linear, then any pattern scaling method would work equally well and would be highly accurate.”
5. P. 3, l. 9: Conversely -> In principle; the findings of the present work do not favour the “physically-based” method.

6. P. 3, l. 30: “this approach automatically accounts for correlations between local temperature and local precipitation changes”. How?
7. P. 4, l. 30: This may be caused (i) by the rather small area of the polar regions and (ii) by the fact that both  $B$  and  $\hat{B}$  are relatively small there.
8. P. 7, 7–8: “If the scaling pattern  $P(x)$  truly is time-invariant, then the results presented in this section will be identical to those previously discussed.” -> “If the scaling pattern  $P(x)$  truly were time-invariant, then the results presented in this section would be identical to those previously discussed.” (They are not identical.)
9. P. 7, l. 16: none -> virtually none ?
10. P. 8, l. 9: I did not understand “The values in Table 3 indicate that Group 1 (13 models) is not an outlier.” Please clarify.
11. P. 8, l. 27: I do not agree with “holds great promise”.
12. Title of section 4 might be modified: you discuss the total forcing and its partition into the CO<sub>2</sub> and non-CO<sub>2</sub> components.
13. P. 9, l. 17: “There is no a priori reason to expect this will work”. Do you mean “There is no a priori reason to expect **that** this will work”?
14. P. 9, l. 30: Giving the actual years (e.g., 2076–2100 for model years 227–251?) would be informative (in figure captions as well).
15. P. 10, l. 11–12: One possible explanation is aerosol forcing.
16. P. 10, 27–28: “If the approach fails, it is because this pattern does not represent actual non-CO<sub>2</sub> forcing.” Noise due to unforced internal variability in the climate system may also have an influence.
17. P. 10, l. 30:  $\log_2([\text{CO}_2])$ . In what units  $[\text{CO}_2]$  is expressed? This determines the values of the coefficients.
18. P. 11, l. 1–2: “The temperature contribution of the non-CO<sub>2</sub> part increases with the CO<sub>2</sub> concentration” was not entirely clear for me.
19. P. 11, l. 22–23: “The epoch difference and regression methods show too much CO<sub>2</sub> response and not enough non-CO<sub>2</sub> response as indicated by the patterns displayed in Figure 15.” Would you please explain in more detail how one can see this?
20. P. 11, l. 27: “values depicted in Figure 16 are almost entirely due to CO<sub>2</sub> forcing”. According to Table 2, the ratio of non-CO<sub>2</sub> to CO<sub>2</sub> forcing does not differ substantially between these two RCP scenarios.
21. P. 11, l. 28–29: “this indicates that the non-CO<sub>2</sub> forcing in RCP2.6 is insufficiently large to overcome issues with low signal-to-noise ratios in reconstructing patterns of precipitation change using this sort of decomposition.” This was difficult to understand. Please explain in more detail.

22. P. 11, l. 30: “polar amplification **of the precipitation response**”. In general, polar amplification refers to the temperature response.
23. P. 12, l. 18: the methods work relatively well, but i regard “excellent” as a too emphatic word.
24. P. 12, l. 25–26: “it is the best equipped to deal with these sources of nonlinearity.” Perhaps in theory, but the present findings do not support this statement.
25. P. 12, l. 32 – p. 13, l. 1: “However, given the difficulties many Earth System Models have with proper representations of convective processes and the resulting precipitation biases those difficulties cause..” -> “However, given the difficulties **that** many Earth System Models (-> **climate models** (?)) have with proper representations of convective processes and the resulting precipitation biases **that** those difficulties cause..” (would be much more easy to understand for a non-native reader).
26. Caption of Fig. 3: should there be  $\hat{B}$  rather than  $\hat{T}$ ?
27. Caption of Fig. 5: “Differences in the precipitation scaling pattern...” Actually, the left column panels do not depict differences but the absolute distributions of  $P_{1-50}$ . Caption text needs revision. The same error occurs in the captions of Figs. 9 and 17.
28. Fig. 8: Should the title of the top panel be “physically-based” rather than “reconstruction”?
29. Fig. 11: this period, years 1965–1989 (if I have calculated correctly), actually does not yet belong to the RCP but to the historical period of the CMIP5 runs.

## References

IPCC, 2013: *Climate Change 2013: The physical science basis. Contribution of Working Group I to the Fifth Assessment Report of the Intergovernmental Panel on Climate Change*. Cambridge University Press, Cambridge, U.K., 1535 pp, [Stocker, T.F., D. Qin, G.-K. Plattner, M. Tignor, S.K. Allen, J. Boschung, A. Nauels, Y. Xia, V. Bex and P.M. Midgley (eds.)].
